# Supplementary material for: Comparison of Patient Satisfaction in Inpatient Care Provided by Hospitalists and Nonhospitalists in South Korea
Source: Int J Environ Res Public Health. 2021 Jul 30;18(15):8101. doi: 10.3390/ijerph18158101 (PMC8345769; doi:10.3390/ijerph18158101)
Supplement: Supplementary file 1 [file ijerph-18-08101-s001.zip › ijerph-1272641-supplementary.pdf]

## Supplementary Materials

**Table S1.** Results of logistic regression on the patient satisfaction on attending physician in the hospitalist ward compared to the non-hospitalist ward for agree and strongly agree

|                                                                                                                      | Satisfaction† |                 |
|----------------------------------------------------------------------------------------------------------------------|---------------|-----------------|
|                                                                                                                      | OR            | 95% CI          |
| <b>Accessibility to attending physician</b>                                                                          |               |                 |
| I was able to meet attending physician soon after the admission                                                      | 1.66          | (1.37 – 2.01)   |
| I was able to consult with attending physician when I request a consultation                                         | 2.23          | (1.85 – 2.68)   |
| Attending physician has responded quickly upon the pain management request                                           | 2.24          | (1.77 – 2.84)   |
| Attending physician has responded quickly upon medicine and procedure request                                        | 2.16          | (1.70 – 2.75)   |
| I was able to meet attending physician more than twice a day (including rounding)                                    | 3.42          | (2.81 – 4.16)   |
| Attending physician has spend adequate amount of time in consultation, procedure, and care services                  | 2.31          | (1.88 – 2.83)   |
| I was able to have answer to my question related to care during admission period of time                             | 2.93          | (2.34 – 3.68)   |
| <b>Attending physician's consultation and care service skills</b>                                                    |               |                 |
| Attending physician let me talk without interrupting                                                                 | 2.73          | (1.96 – 3.79)   |
| Attending physician checked to be sure I understood everything                                                       | 2.54          | (1.97 – 3.28)   |
| Attending physician communicated fully related to my care and possible negative outcomes                             | 1.59          | (1.23 – 2.05)   |
| Attending physician was not in a rush when he/she was with me                                                        | 2.14          | (1.73 – 2.65)   |
| Attending physician's explanation was easy to understand                                                             | 2.73          | (2.13 – 3.50)   |
| Attending physician showed interest in my views and options about my health                                          | 3.48          | (2.66 – 4.56)   |
| How do you rate attending physician's skill in diagnosing and treating your medical condition?                       | 2.01          | (1.54 – 2.61)   |
| Attending physician kept me informed of the plans for my care                                                        | 2.24          | (1.79 – 2.80)   |
| How do you rate attending physician's fund of knowledge?                                                             | 2.00          | (1.62 – 2.47)   |
| Attending physician effectively prepared me for discharge                                                            | 1.91          | (1.54 – 2.38)   |
| Attending physician re-explained discharge guidelines in details at discharge                                        | 2.33          | (1.86 – 2.93)   |
| <b>Overall satisfaction evaluation</b>                                                                               |               |                 |
| Overall satisfaction on attending physician (beta, <i>p</i> -value)                                                  | 0.434         | <0.0001         |
| Overall satisfaction on hospital service (beta, <i>p</i> -value)                                                     | 0.375         | <0.0001         |
| Overall satisfaction on my health status prior to the admission (beta, <i>p</i> -value)                              | 0.283         | <0.0001         |
| I would pay extra cost to admitted in the medical ward where care and services are provided specialist (hospitalist) | 41.86         | (30.39 – 57.66) |

\* Fully adjusted for the analysis; † Satisfaction measured in combination of 'agree' and 'strongly agree'

**Table S2.** Results of logistic regression on the patient satisfaction on attending physician in the hospitalist ward compared to the non-hospitalist ward with *p*-value ‡.

|                                                                                                                      | Satisfaction |                 |
|----------------------------------------------------------------------------------------------------------------------|--------------|-----------------|
|                                                                                                                      | OR           | <i>p</i> -value |
| <b>Accessibility to attending physician</b>                                                                          |              |                 |
| I was able to meet attending physician soon after the admission                                                      | 2.57         | <0.0001         |
| I was able to consult with attending physician when I request a consultation                                         | 2.75         | <0.0001         |
| Attending physician has responded quickly upon the pain management request                                           | 2.23         | <0.0001         |
| Attending physician has responded quickly upon medicine and procedure request                                        | 2.25         | <0.0001         |
| I was able to meet attending physician more than twice a day (including rounding)                                    | 3.46         | <0.0001         |
| Attending physician has spent adequate amount of time in consultation, procedure, and care services                  | 2.42         | <0.0001         |
| I was able to have answer to my question related to care during admission period of time                             | 2.39         | <0.0001         |
| <b>Attending physician's consultation and care service skills</b>                                                    |              |                 |
| Attending physician let me talk without interrupting                                                                 | 2.22         | <0.0001         |
| Attending physician checked to be sure I understood everything                                                       | 2.08         | <0.0001         |
| Attending physician communicated fully related to my care and possible negative outcomes                             | 1.78         | <0.0001         |
| Attending physician was not in a rush when he/she was with me                                                        | 1.94         | <0.0001         |
| Attending physician's explanation was easy to understand                                                             | 2.33         | <0.0001         |
| Attending physician showed interest in my views and options about my health                                          | 2.25         | <0.0001         |
| How do you rate attending physician's skill in diagnosing and treating your medical condition?                       | 1.86         | <0.0001         |
| Attending physician kept me informed of the plans for my care                                                        | 2.02         | <0.0001         |
| How do you rate attending physician's fund of knowledge?                                                             | 1.65         | <0.0001         |
| Attending physician effectively prepared me for discharge                                                            | 1.58         | <0.0001         |
| Attending physician re-explained discharge guidelines in details at discharge                                        | 1.98         | <0.0001         |
| <b>Overall satisfaction evaluation</b>                                                                               |              |                 |
| Overall satisfaction on attending physician (beta, <i>p</i> -value)                                                  | 0.431        | <0.0001         |
| Overall satisfaction on hospital service (beta, <i>p</i> -value)                                                     | 0.371        | <0.0001         |
| Overall satisfaction on my health status prior to the admission (beta, <i>p</i> -value)                              | 0.263        | 0.0004          |
| I would pay extra cost to admitted in the medical ward where care and services are provided specialist (hospitalist) | 44.07        | <0.0001         |

‡Fully adjusted for the analysis (adjusted variables: sex, age, medical division, admission type, and region, surgery, general anesthesia, intensive care unit (ICU) transfer, death, hypertension, diabetes, hepatitis, tuberculosis, dialysis, Charlson's comorbidity index (CCI) score)

**Table S3.** Results of logistic regression on the patient satisfaction on attending physician in the hospitalist ward compared to the non-hospitalist ward by region with  $p$ -value ‡.

|                                                                                                     | Medical Division  |         |         |         |
|-----------------------------------------------------------------------------------------------------|-------------------|---------|---------|---------|
|                                                                                                     | Internal Medicine |         | Surgery |         |
|                                                                                                     | OR                | p-value | OR      | p-value |
| <b>Accessibility to attending physician</b>                                                         |                   |         |         |         |
| I was able to meet attending physician soon after the admission                                     | 3.38              | <0.0001 | 1.30    | 0.2165  |
| I was able to consult with attending physician when I request a consultation                        | 3.59              | <0.0001 | 1.15    | 0.5576  |
| Attending physician has responded quickly upon the pain management request                          | 3.90              | <0.0001 | 1.06    | 0.7616  |
| Attending physician has responded quickly upon medicine and procedure request                       | 2.84              | <0.0001 | 1.14    | 0.4879  |
| I was able to meet attending physician more than twice a day (including rounding)                   | 3.47              | <0.0001 | 3.68    | 0.0000  |
| Attending physician has spent adequate amount of time in consultation, procedure, and care services | 3.19              | <0.0001 | 1.20    | 0.3881  |
| I was able to have answer to my question related to care during admission period of time            | 3.09              | <0.0001 | 1.06    | 0.7784  |
| <b>Attending physician's consultation and care service</b>                                          |                   |         |         |         |
| Attending physician let me talk without interrupting                                                | 2.70              | <0.0001 | 1.19    | 0.4086  |
| Attending physician checked to be sure I understood everything                                      | 2.53              | <0.0001 | 1.15    | 0.5488  |
| Attending physician communicated fully related to my care and possible negative outcomes            | 2.01              | <0.0001 | 0.98    | 0.9321  |
| Attending physician was not in a rush when he/she was with me                                       | 2.55              | <0.0001 | 0.82    | 0.3905  |
| Attending physician's explanation was easy to understand                                            | 2.86              | <0.0001 | 1.20    | 0.4052  |
| Attending physician showed interest in my views and options about my health                         | 2.88              | <0.0001 | 1.55    | 0.0418  |
| How do you rate attending physician's skill in diagnosing and treating your medical condition?      | 2.29              | <0.0001 | 0.92    | 0.7096  |
| Attending physician kept me informed of the plans for my care                                       | 2.71              | <0.0001 | 0.89    | 0.6179  |
| How do you rate attending physician's fund of knowledge?                                            | 1.71              | 0.0001  | 1.43    | 0.1014  |
| Attending physician effectively prepared me for discharge                                           | 1.77              | 0.0003  | 1.08    | 0.7647  |
| Attending physician re-explained discharge guidelines in details at discharge                       | 2.27              | <0.0001 | 1.03    | 0.9069  |
| <b>Surgical patient only</b>                                                                        |                   |         |         |         |
| I am satisfied with the overall treatment and management after surgery                              |                   |         | 1.02    | 0.9361  |
| I am received satisfactory care when I requested for pain control at the surgical site              |                   |         | 1.10    | 0.6860  |
| I am satisfied with the operation site infection management                                         |                   |         | 1.17    | 0.4974  |
| <b>Satisfaction evaluation</b>                                                                      |                   |         |         |         |
| Overall satisfaction on attending physician (beta, $p$ -value)                                      | 0.610             | <.0001  | 0.253   | 0.0117  |
| Overall satisfaction on hospital service (beta, $p$ -value)                                         | 0.554             | <.0001  | 0.138   | 0.2289  |

|                                                               |       |         |       |        |
|---------------------------------------------------------------|-------|---------|-------|--------|
| <b>Overall satisfaction on my health status</b>               |       |         |       |        |
| prior to the admission (beta, <i>p</i> -value)                | 0.296 | <.0001  | 0.293 | 0.0156 |
| I would pay extra cost to admitted in the medical ward        |       |         |       |        |
| where care and services are provided specialist (hospitalist) | 37.94 | <0.0001 | 29.65 | 0.0014 |

‡Fully adjusted for the analysis (adjusted variables: sex, age, medical division, admission type, and region, surgery, general anesthesia, intensive care unit (ICU) transfer, death, hypertension, diabetes, hepatitis, tuberculosis, dialysis, Charlson's comorbidity index (CCI) score)
